# Supplementary material
Source: PubMed Central journal article supplement (PMC3544278)

## Supporting Information for:

# Radiosynthesis and Evaluation of [ $^{11}\text{C}$ -*Carbonyl*]-Labeled Carbamates as Fatty Acid Amide Hydrolase Radiotracers for Positron Emission Tomography.

*Alan A. Wilson<sup>a,b,\*</sup>, Justin W. Hicks<sup>a</sup>, Oleg Sadovski<sup>a</sup>, Jun Parkes<sup>a</sup>, Junchao Tong<sup>a</sup>, Sylvain Houle<sup>a,b</sup>, Christopher J. Fowler<sup>c</sup>, and Neil Vasdev<sup>a,b,d</sup>*

<sup>a</sup>Research Imaging Centre, Centre for Addiction and Mental Health, Toronto, Ontario, Canada M5T 1R8  
Toronto, Ontario, Canada .

<sup>b</sup>Dept of Psychiatry, University of Toronto, Toronto, Ontario, Canada M5T 1R8

<sup>c</sup>Dept. of Pharmacology and Clinical Neuroscience, Umeå University, SE90187, Umeå, Sweden

<sup>d</sup>Current address, Division of Nuclear Medicine and Molecular Imaging, Massachusetts General Hospital, Boston Massachusetts, 02114, USA.

### Contents:

1. Time-dependent inhibition of rat brain FAAH by **1** and **8**
2. Regional brain biodistribution of [ $^{11}\text{C}$ -*carbonyl*]carbamates in rats.
3. Kinetics of irreversible binding of [ $^{11}\text{C}$ -*carbonyl*]carbamates to FAAH ex vivo in rat brain.
4. Select RadioHPLC chromatograms from radiosynthesis of [ $^{11}\text{C}$ - *carbonyl*]carbamates
5.  $^1\text{H}$  and  $^{13}\text{C}$  NMR spectra of reported compounds.

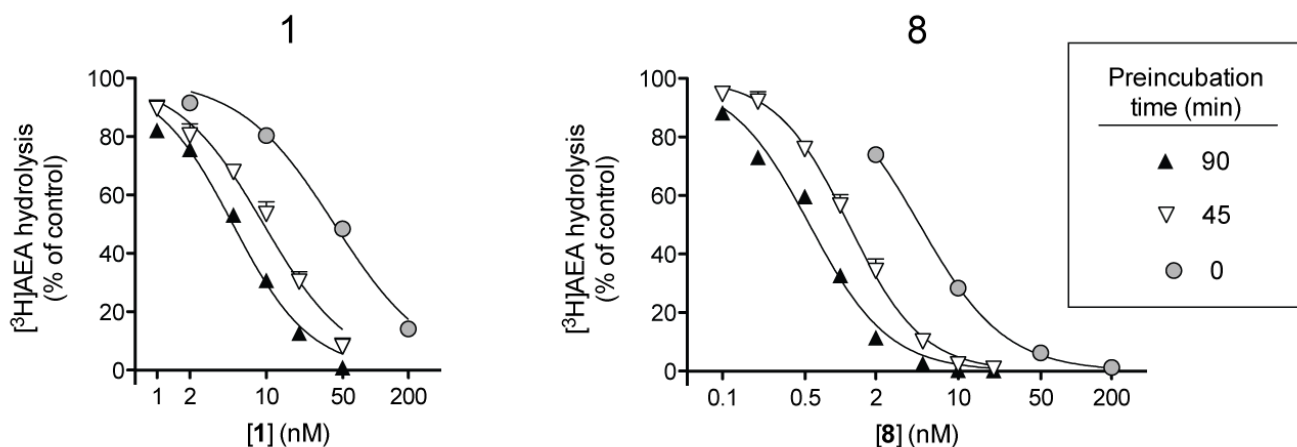

Figure S1. Time-dependent incubation by **8** (top panel) and **1** (bottom panel) of 0.5 μM [<sup>3</sup>H]anandamide hydrolysis by rat brain homogenates. Shown are means ± s.e.m. (when not enclosed by the symbols), n=3, of the activity as % of the vehicle controls.

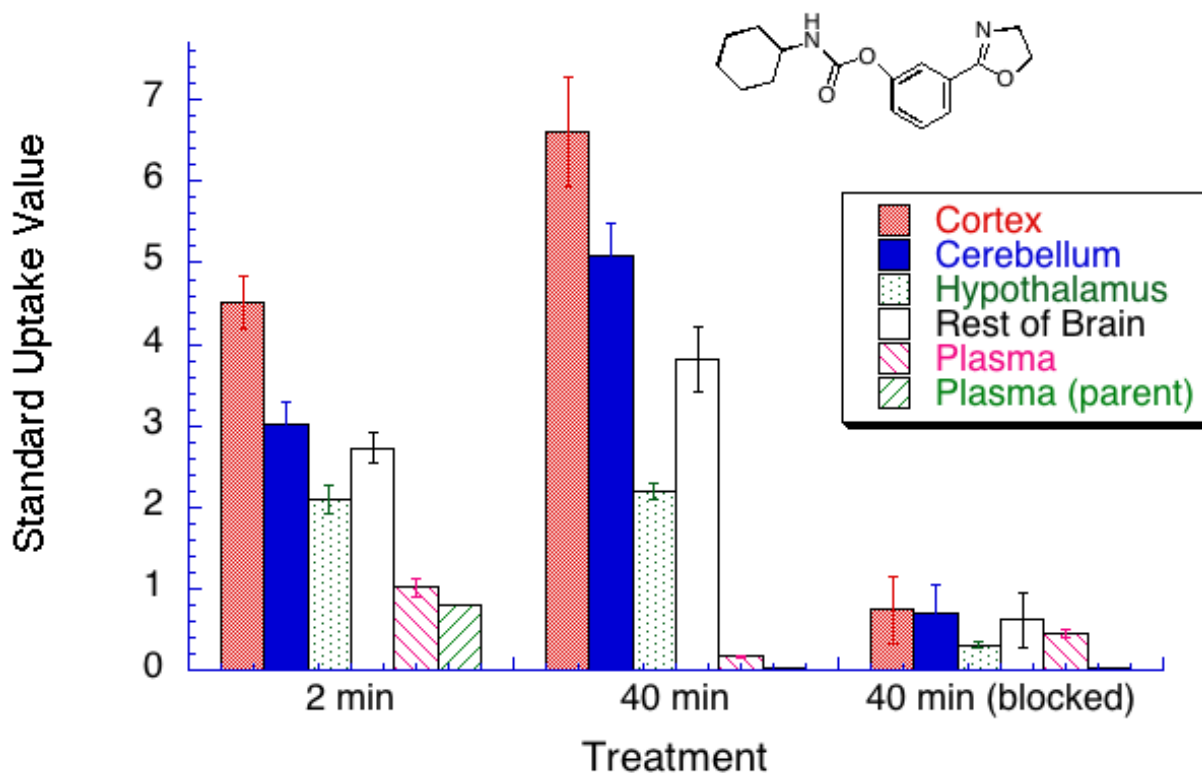

Figures S2. Regional uptake of radioactivity in rat brain [<sup>11</sup>C]6 at 2 and 40 min post iv injection. The blocked group was pre-treated with URB597 (2mg/kg, ip). Each value represents the mean (n=5) ± SD.

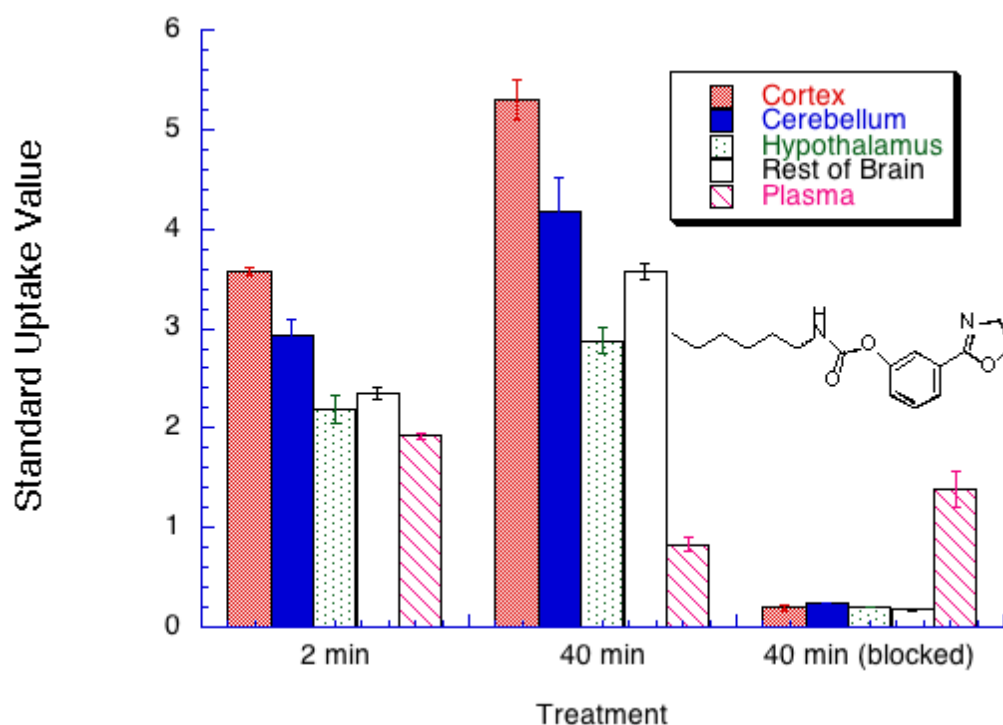

Figures S3. Regional uptake of radioactivity in rat brain [<sup>11</sup>C]8 at 2 and 40 min post iv injection. The blocked group was pre-treated with URB597 (2mg/kg, ip). Each value represents the mean (n=5) ± SD.

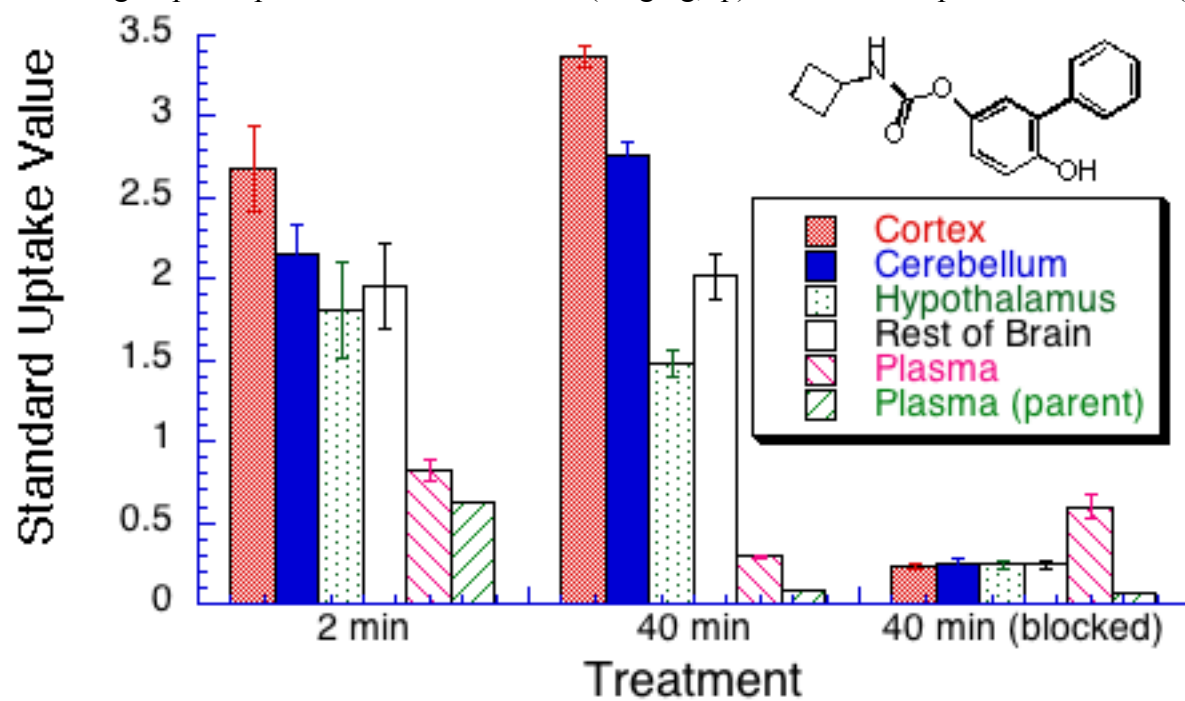

Figures S4. Regional uptake of radioactivity in rat brain [<sup>11</sup>C]4 at 2 and 40 min post iv injection. The blocked group was pre-treated with URB597 (2mg/kg, ip). Each value represents the mean (n=5) ± SD.

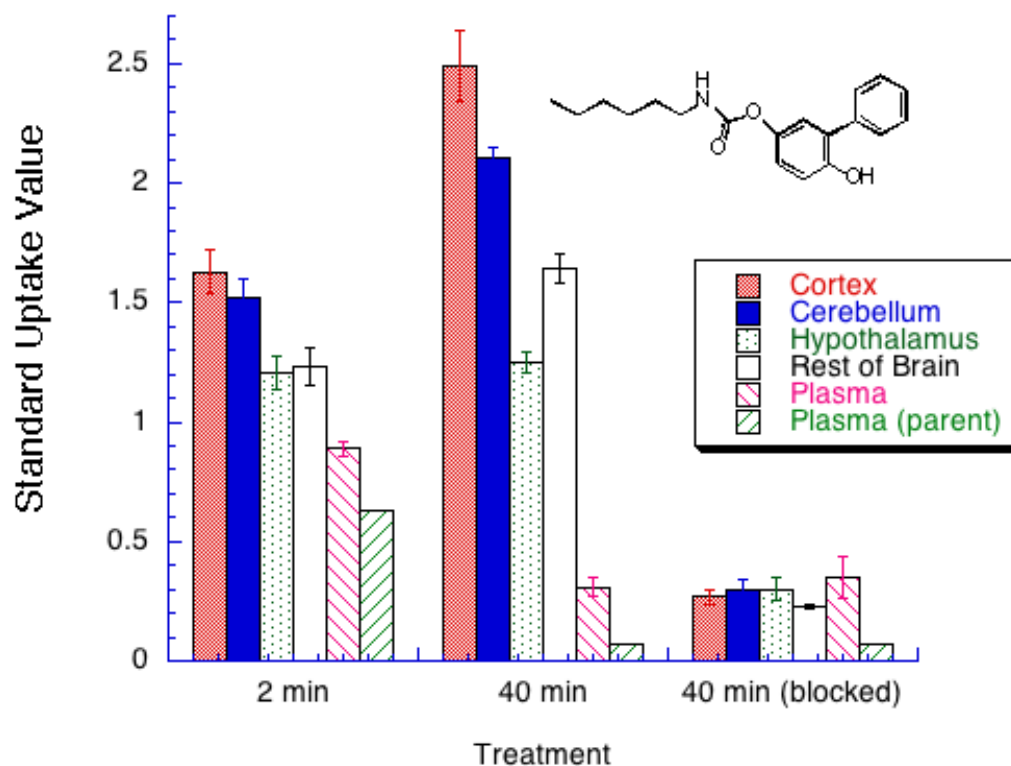

Figures S5. Regional uptake of radioactivity in rat brain [<sup>11</sup>C]5 at 2 and 40 min post iv injection. The blocked group was pre-treated with URB597 (2mg/kg, ip). Each value represents the mean (n=5) ± SD.

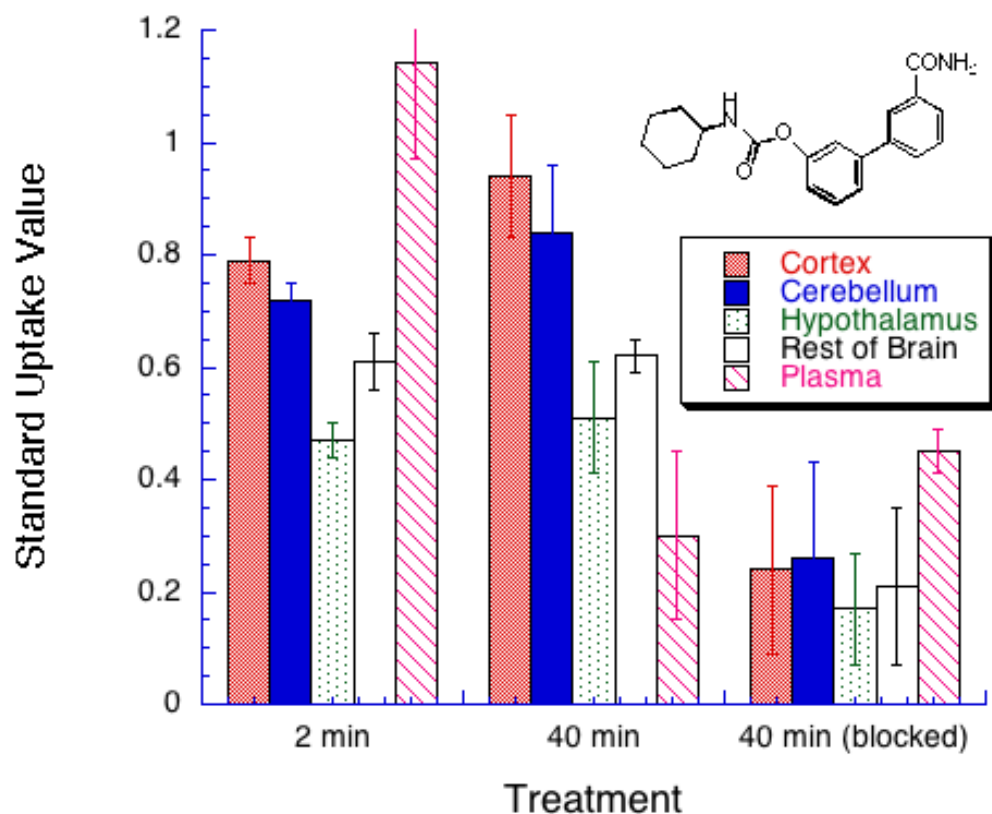

Figures S6. Regional uptake of radioactivity in rat brain [<sup>11</sup>C]2 at 2 and 40 min post iv injection. The blocked group was pre-treated with URB597 (2mg/kg, ip). Each value represents the mean (n=5) ± SD.

**Amount of [<sup>11</sup>C] irreversibly bound  
to rat brain tissue as a function of time  
(n=4/timepoint)**

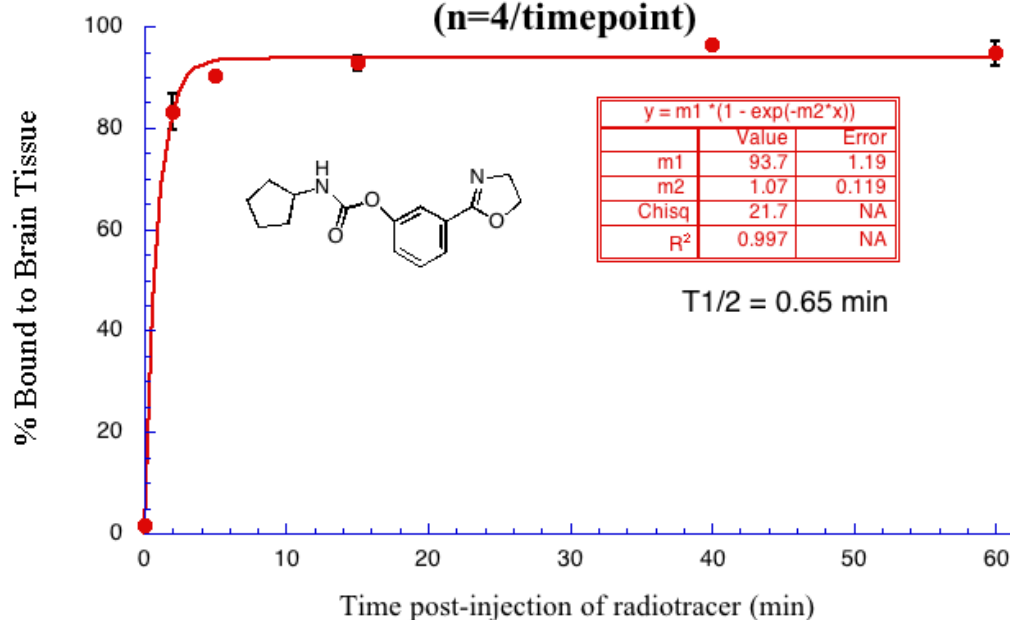

Figure S7. % of radioactivity irreversibly bound to rat brain parenchyma post-intravenous injection of [<sup>11</sup>C]7 (n=4/group) at various time points.

**Amount of [<sup>11</sup>C] irreversibly bound  
to rat brain tissue as a function of time  
(n=4/timepoint)**

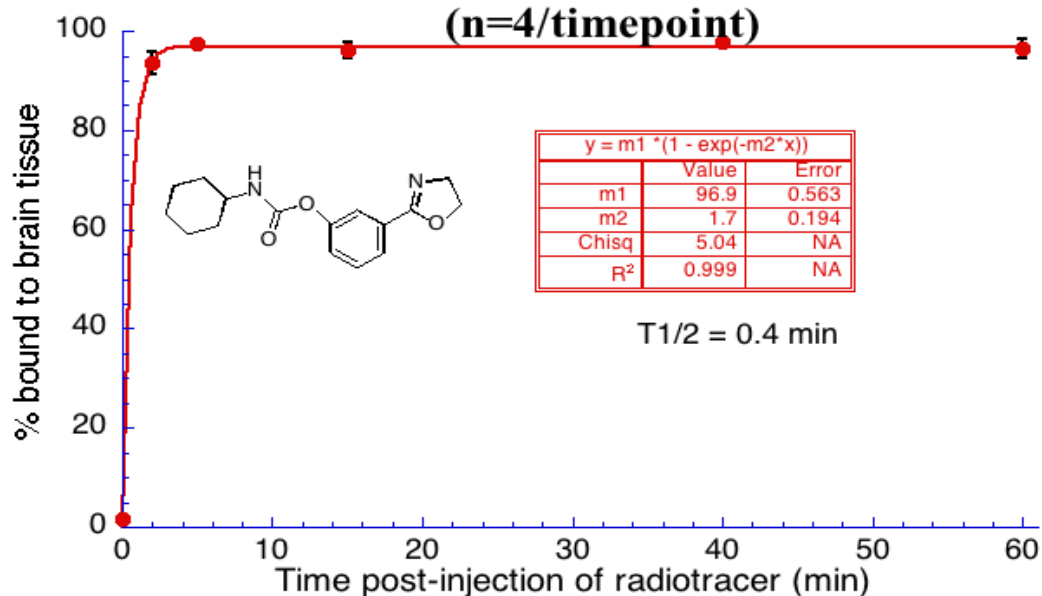

Figure S8. % of radioactivity irreversibly bound to rat brain parenchyma post-intravenous injection of [<sup>11</sup>C]6 (n=4/group) at various time points.

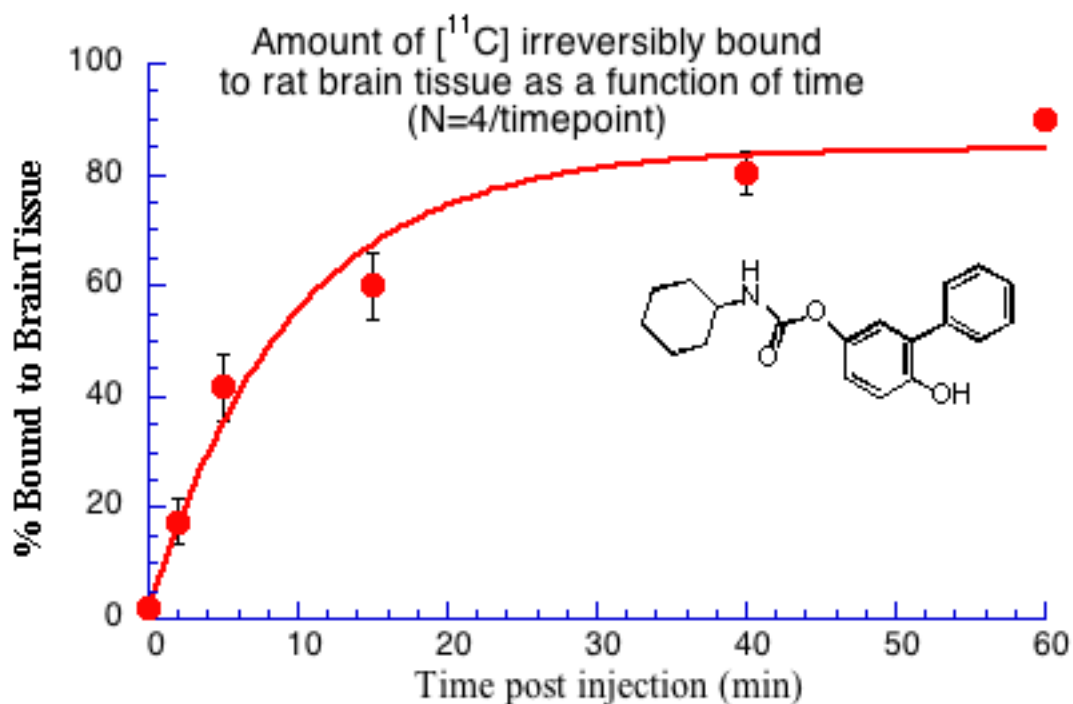

Figure S9. % of radioactivity irreversibly bound to rat brain parenchyma post-intravenous injection of [ $^{11}\text{C}$ ]1 (n= 4/group) at various time points.

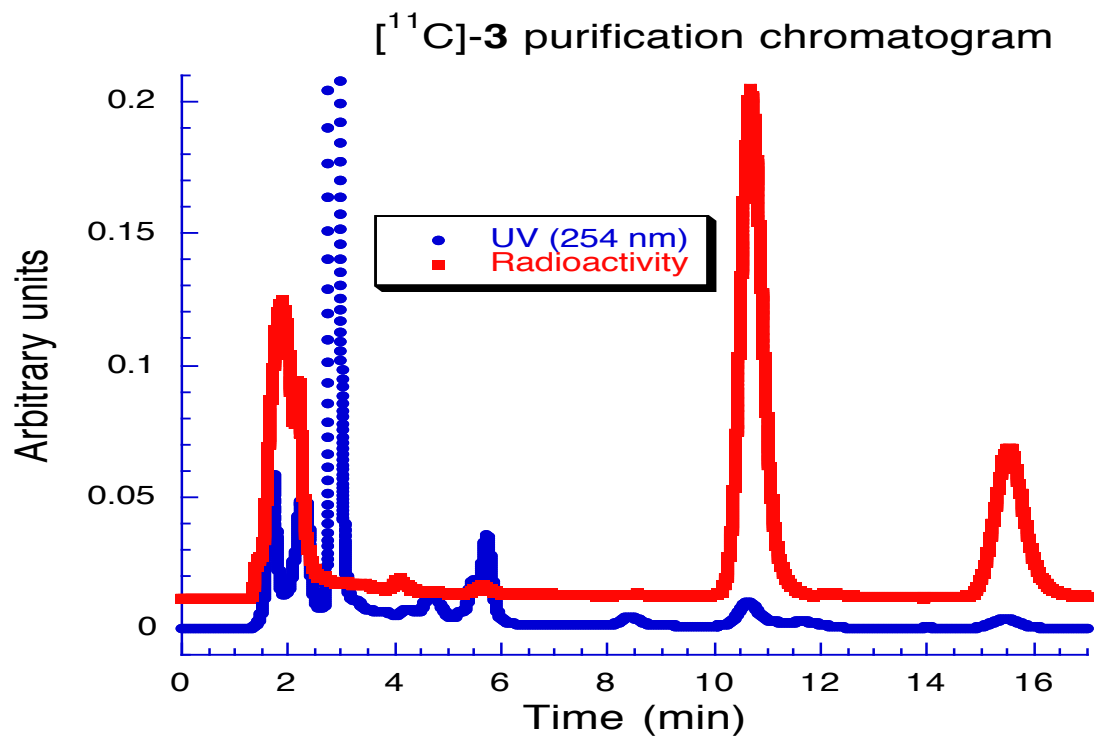

Figure S10. Radio-HPLC chromatogram: purification of [ $^{11}\text{C}$ ]3 which elutes at 15.5 min. The large radioactivity peak at 11 min corresponds to the unwanted regioisomer. Conditions: Phenomenex Luna C18(2), 250x10mm, 10  $\mu$ , 60/40 MeOH/H<sub>2</sub>O +0.1N ammonium formate, 254nm, 9 mL/min.

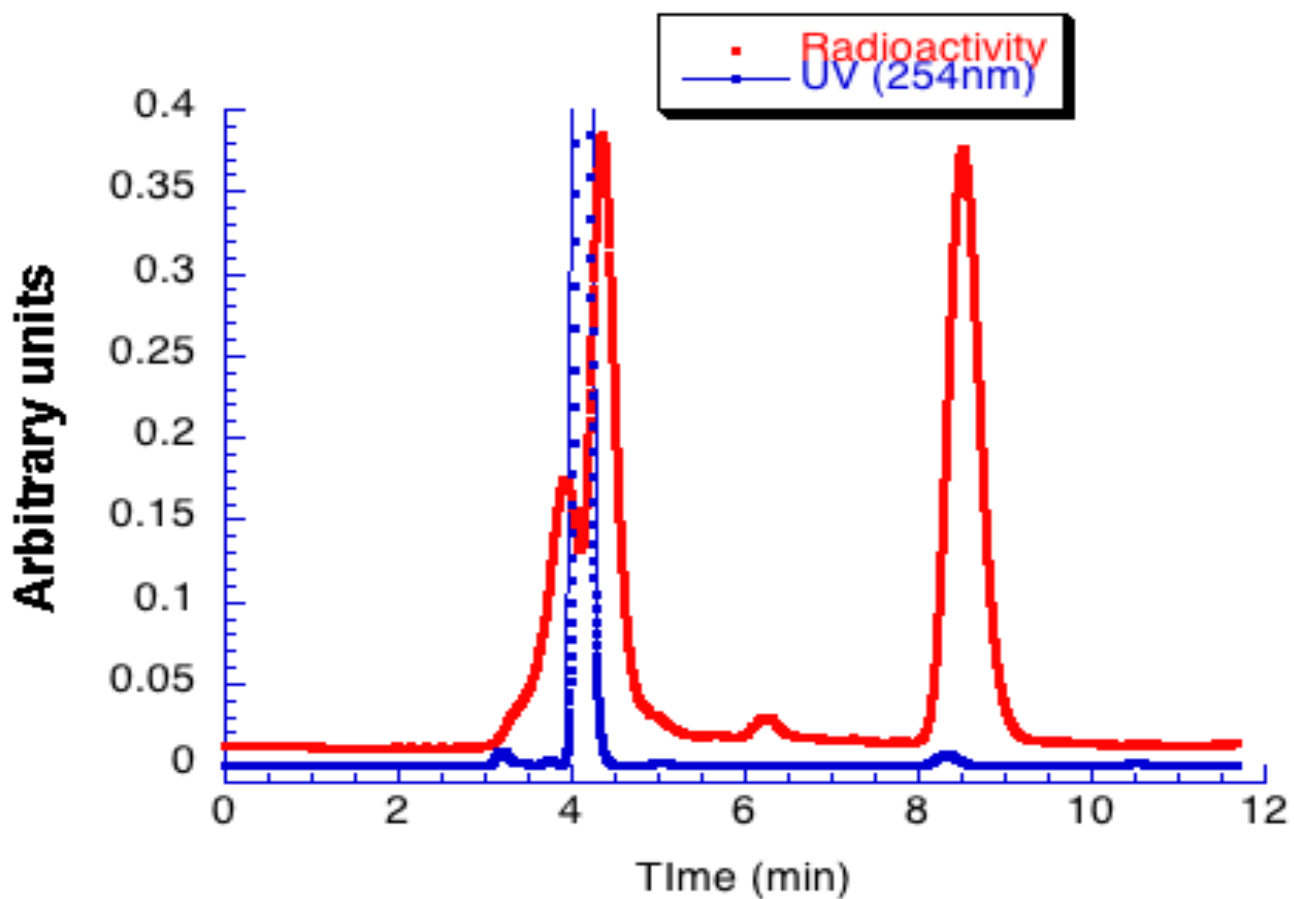

Figure S11. Radio-HPLC chromatogram: purification of [ $^{11}\text{C}$ ]6 which elutes at 8.4 min. Conditions: Phenomenex Luna C18(2), 250x10mm, 10  $\mu$ , 40/60  $\text{CH}_3\text{CN}/\text{H}_2\text{O}$  +0.1N ammonium formate, 254nm, 7 mL/min.

# <sup>1</sup>H and <sup>13</sup>C NMR of 2

6/8/2012 11:08:13 AM

| Formula C <sub>12</sub> H <sub>10</sub> N <sub>2</sub> O <sub>2</sub> |                                                            | FW 338.4003          |            |                        |             |
|-----------------------------------------------------------------------|------------------------------------------------------------|----------------------|------------|------------------------|-------------|
| Acquisition Time (sec)                                                | 2.5641                                                     | Date                 | Jun 6 2012 | Date Stamp             | Jun 6 2012  |
| File Name                                                             | F:\NV-NMR-2\20120606_mercury_400_NV-ALLAN-urb597-PROTON_01 | Frequency (MHz)      | 399.33     |                        |             |
| Nucleus                                                               | <sup>1</sup> H                                             | Number of Transients | 16         | Original Points Count  | 16384       |
| Pulse Sequence                                                        | s2pul                                                      | Receiver Gain        | 30.00      | Solvent                | METHANOL-d4 |
| Spectrum Offset (Hz)                                                  | 2398.0574                                                  | Sweep Width (Hz)     | 6389.78    | Temperature (degree C) | 25.000      |

<sup>1</sup>H NMR (399 MHz, METHANOL-d<sub>4</sub>) δ ppm 1.16 - 1.45 (m, 5 H) 1.59 - 1.71 (m, 1 H) 1.75 - 1.85 (m, 2 H) 1.90 - 2.02 (m, 2 H) 3.39 - 3.50 (m, 1 H) 7.12 (d, =7.02 Hz, 1 H) 7.39 - 7.43 (m, 1 H) 7.46 (t, =7.80 Hz, 1 H) 7.51 - 7.58 (m, 2 H) 7.78 - 7.89 (m, 2 H) 8.14 (s, 1 H)

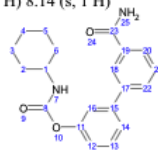

20120606\_mercury\_400\_NV-ALLAN-urb597-PROTON\_01.esp

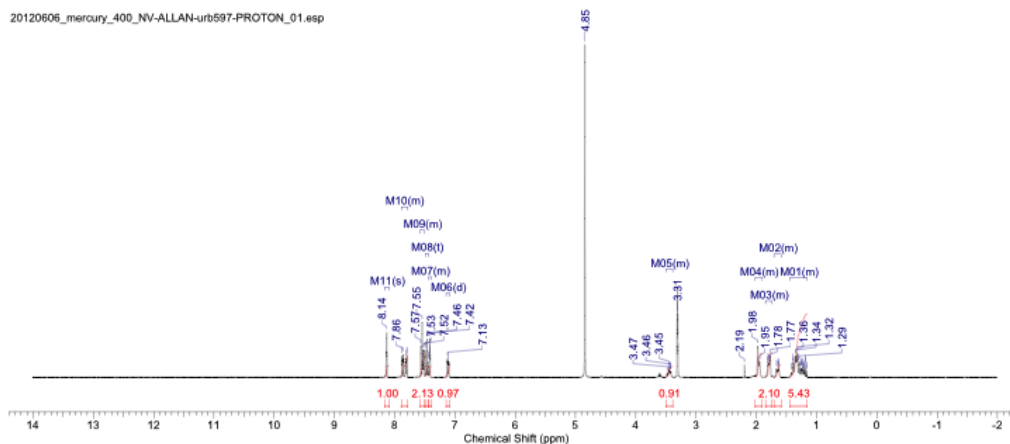

6/8/2012 11:14:26 AM

| Formula C <sub>12</sub> H <sub>10</sub> N <sub>2</sub> O <sub>2</sub> |                                                      | FW 338.4003            |            |                       |            |
|-----------------------------------------------------------------------|------------------------------------------------------|------------------------|------------|-----------------------|------------|
| Acquisition Time (sec)                                                | 1.3042                                               | Date                   | Jun 7 2012 | Date Stamp            | Jun 7 2012 |
| File Name                                                             | F:\NV-NMR-2\20120607_mercury_400_ALLAN-597-CARBON_01 | Frequency (MHz)        | 100.42     |                       |            |
| Nucleus                                                               | <sup>13</sup> C                                      | Number of Transients   | 5000       | Original Points Count | 23541      |
| Pulse Sequence                                                        | s2pul                                                | Receiver Gain          | 39.00      | Solvent               | DMSO-d6    |
| Spectrum Offset (Hz)                                                  | 18050.54                                             | Temperature (degree C) | 25.000     | Spectrum Offset (Hz)  | 9281.7891  |

<sup>13</sup>C NMR (100 MHz, DMSO-d<sub>6</sub>) δ ppm 26.32 (s, 1 C) 26.77 (s, 1 C) 34.17 (s, 1 C) 51.83 (s, 1 C) 121.69 (s, 1 C) 122.29 (s, 1 C) 125.04 (s, 1 C) 127.40 (s, 1 C) 128.05 (s, 1 C) 130.35 (s, 1 C) 131.01 (s, 1 C) 131.56 (s, 1 C) 135.78 (s, 1 C) 142.04 (s, 1 C) 143.07 (s, 1 C) 153.41 (s, 1 C) 156.52 (s, 1 C) 172.30 (s, 1 C)

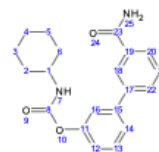

20120607\_mercury\_400\_ALLAN-597-CARBON\_01.esp

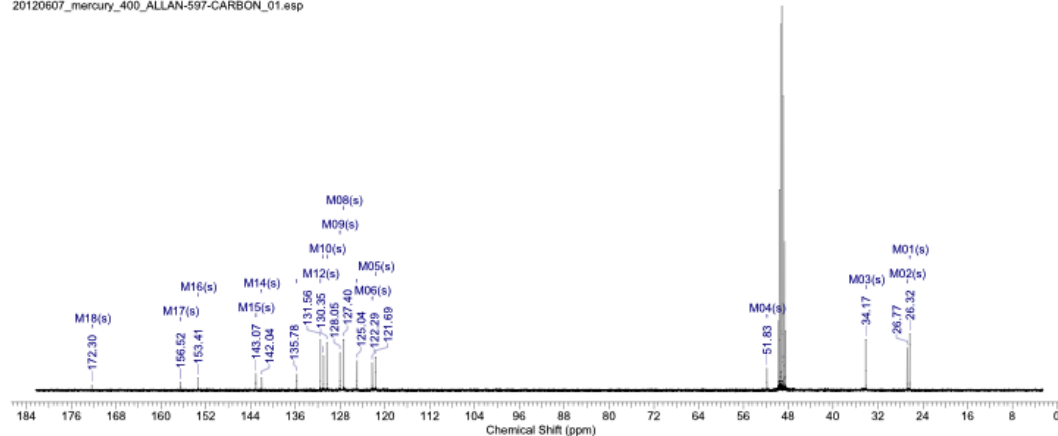



# <sup>1</sup>H and <sup>13</sup>C NMR of 3

4/15/2011 4:39:53 PM

| Formula               | C                                                 | H                    | NO          | FW                     | 297.3484        |              |       |
|-----------------------|---------------------------------------------------|----------------------|-------------|------------------------|-----------------|--------------|-------|
| AcquisitionTime (sec) | 1.3005                                            | Date                 | Apr 13 2011 | Date Stamp             | Apr 13 2011     |              |       |
| File Name             | H1NV-NMR-2\20110413-Allan-C5CURB-C13_5_Carbon-002 |                      |             |                        | Frequency (MHz) | 100.44       |       |
| Nucleus               | <sup>13</sup> C                                   | Number of Transients | 512         | Original Points Count  | 31337           | Points Count | 32758 |
| Pulse Sequence        | s2pul                                             | Receiver Gain        | 39.00       | Solvent                | CHLOROFORM-d    |              |       |
| Spectrum Offset (Hz)  | 10544.9658                                        | Sweep Width (Hz)     | 24096.38    | Temperature (degree C) | 25.000          |              |       |

<sup>13</sup>C NMR (100 MHz, CHLOROFORM-d) δ ppm 23.77 (s, 1 C) 33.41 (s, 1 C) 53.25 (s, 1 C) 58.81 (s, 1 C) 116.61 (s, 1 C) 122.30 (s, 1 C) 123.33 (s, 1 C) 128.18 (s, 1 C) 128.79 (s, 1 C) 129.27 (s, 1 C) 129.37 (s, 1 C) 136.81 (s, 1 C) 144.63 (s, 1 C) 150.09 (s, 1 C) 163.44 (s, 1 C)

20110413-Allan-C5CURB-C13\_5\_Carbon-002.esp

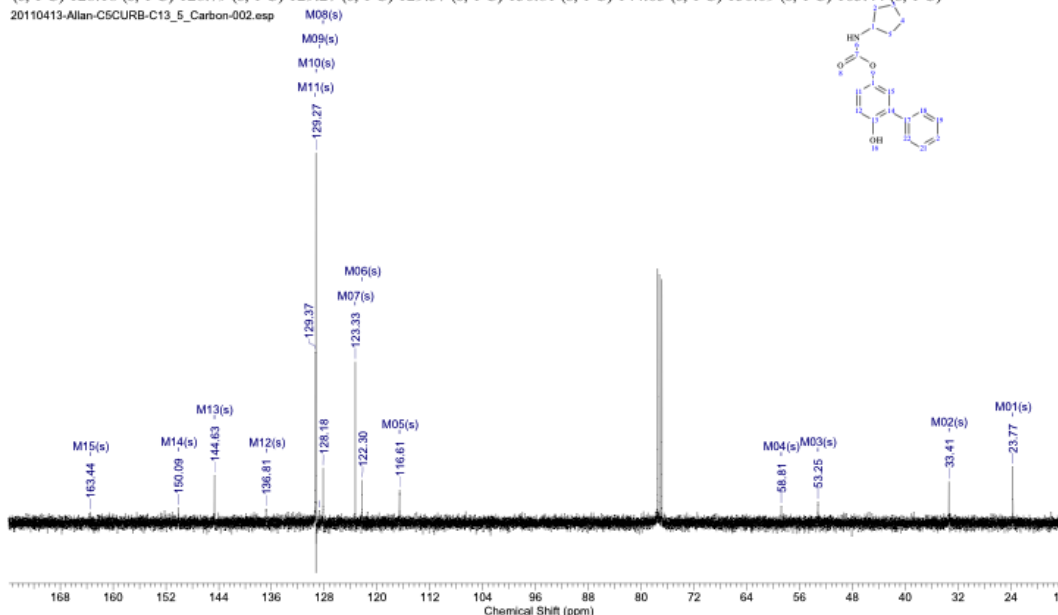

4/15/2011 4:19:36 PM

| Formula               | C                                             | H                      | NO          | FW                    | 297.3484        |                      |           |
|-----------------------|-----------------------------------------------|------------------------|-------------|-----------------------|-----------------|----------------------|-----------|
| AcquisitionTime (sec) | 2.9925                                        | Date                   | Apr 13 2011 | Date Stamp            | Apr 13 2011     |                      |           |
| File Name             | H1NV-NMR-2\20110413-Allan-C5CURB_5_Proton-002 |                        |             |                       | Frequency (MHz) | 399.40               |           |
| Nucleus               | <sup>1</sup> H                                | Number of Transients   | 16          | Original Points Count | 19109           | Points Count         | 32758     |
| Pulse Sequence        | s2pul                                         | Receiver Gain          | 30.00       | Solvent               | CHLOROFORM-d    | Spectrum Offset (Hz) | 2395.6104 |
| Sweep Width (Hz)      | 6385.70                                       | Temperature (degree C) | 25.000      |                       |                 |                      |           |

<sup>1</sup>H NMR (399 MHz, CHLOROFORM-d) δ ppm 1.42 - 1.54 (m, 2 H) 1.56 - 1.77 (m, 4 H) 1.96 - 2.07 (m, 2 H) 4.00 - 4.11 (m, 1 H) 4.95 (d, =6.63 Hz, 1 H) 5.35 (s, 1 H) 6.87 - 6.92 (m, 1 H) 6.96 - 7.00 (m, 1 H) 7.00 - 7.02 (m, 1 H) 7.38 (dq, =8.50, 4.31 Hz, 1 H) 7.43 - 7.49 (m, 4 H)

20110413-Allan-C5CURB\_5\_Proton-002

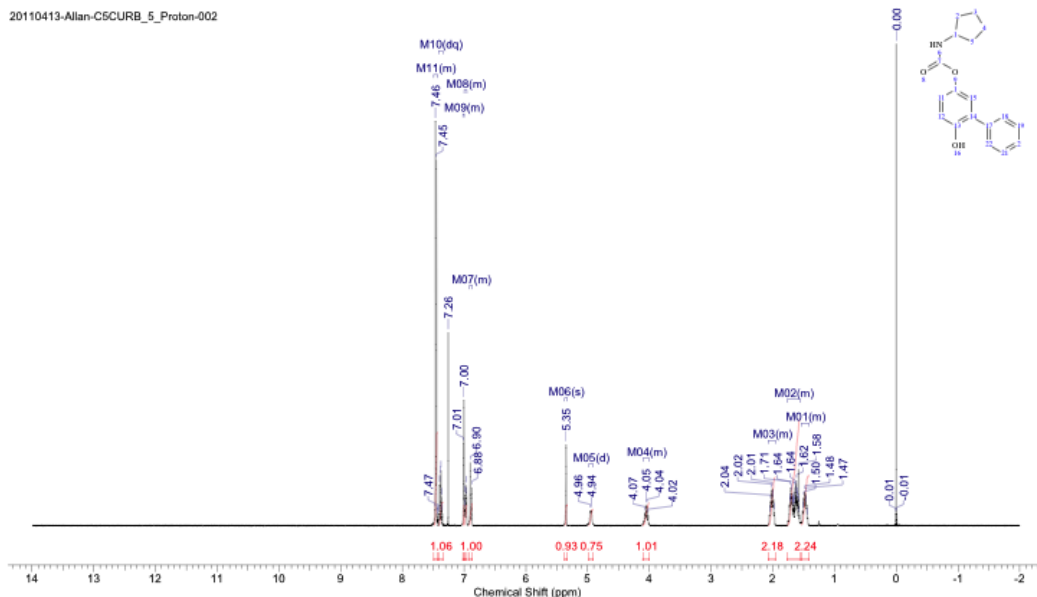

# $^1\text{H}$ and $^{13}\text{C}$ NMR of 4

6/8/2012 10:58:54 AM

| Formula                | C                                                           | H                    | NO <sub>3</sub> | FW                     | 283.3218        |              |       |
|------------------------|-------------------------------------------------------------|----------------------|-----------------|------------------------|-----------------|--------------|-------|
| Acquisition Time (sec) | 2.5641                                                      | Date                 | Jun. 6. 2012    | Date Stamp             | Jun. 6. 2012    |              |       |
| File Name              | F:\INV-NMR-2\20120606_mercury_400_NV-ALLAN-C4CURB-PROTON_01 |                      |                 |                        | Frequency (MHz) | 399.33       |       |
| Nucleus                | $^1\text{H}$                                                | Number of Transients | 16              | Original Points Count  | 16384           | Points Count | 16384 |
| Pulse Sequence         | s2pul                                                       | Receiver Gain        | 39.00           | Solvent                | METHANOL-d4     |              |       |
| Spectrum Offset (Hz)   | 2395.9661                                                   | Sweep Width (Hz)     | 6389.78         | Temperature (degree C) | 25.000          |              |       |

$^1\text{H}$  NMR (399 MHz, METHANOL-*d*<sub>4</sub>)  $\delta$  ppm 1.62 - 1.78 (m, 2 H) 1.94 - 2.09 (m, 2 H) 2.22 - 2.35 (m, 2 H) 4.04 - 4.18 (m, =8.58, 8.29, 8.14, 8.14 Hz, 1 H) 6.85 - 6.87 (m, 2 H) 6.95 (d, =3.12 Hz, 1 H) 7.25 - 7.31 (m, 1 H) 7.37 (t, =7.41 Hz, 2 H) 7.50 - 7.57 (m, 2 H)

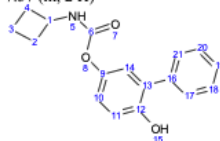

20120606\_mercury\_400\_NV-ALLAN-C4CURB-PROTON\_01.esp

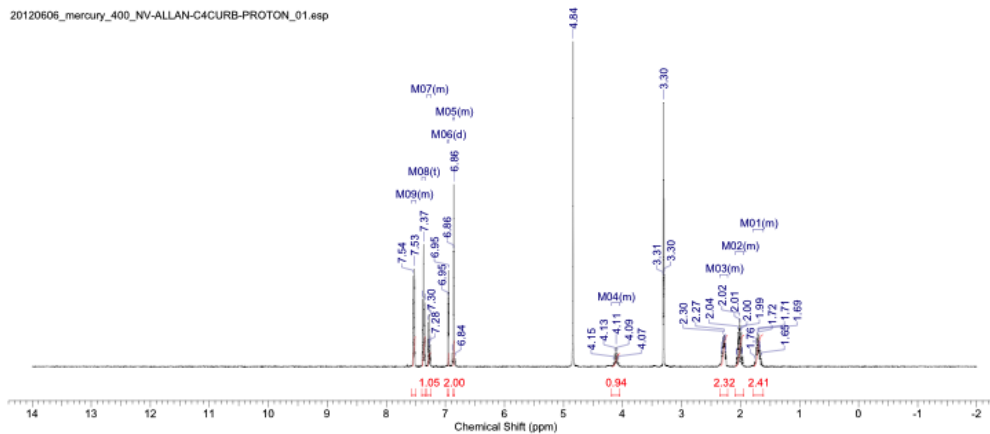

6/8/2012 11:06:34 AM

| Formula                | C                                                    | H                      | NO           | FW                    | 283.3218        |                      |           |
|------------------------|------------------------------------------------------|------------------------|--------------|-----------------------|-----------------|----------------------|-----------|
| Acquisition Time (sec) | 1.3042                                               | Date                   | Jun. 7. 2012 | Date Stamp            | Jun. 7. 2012    |                      |           |
| File Name              | F:\INV-NMR-2\20120608_mercury_400_ALLAN-C4-CARBON_01 |                        |              |                       | Frequency (MHz) | 100.42               |           |
| Nucleus                | $^{13}\text{C}$                                      | Number of Transients   | 5000         | Original Points Count | 23541           | Points Count         | 32768     |
| Pulse Sequence         | s2pul                                                | Receiver Gain          | 39.00        | Solvent               | DMSO-d6         | Spectrum Offset (Hz) | 9281.7891 |
| Sweep Width (Hz)       | 18050.54                                             | Temperature (degree C) | 25.000       |                       |                 |                      |           |

$^{13}\text{C}$  NMR (100 MHz, DMSO-*d*<sub>6</sub>)  $\delta$  ppm 15.78 (s, 1 C) 31.68 (s, 1 C) 47.73 (s, 1 C) 117.40 (s, 1 C) 122.58 (s, 1 C) 124.72 (s, 1 C) 128.10 (s, 1 C) 129.19 (s, 1 C) 130.46 (s, 1 C) 130.58 (s, 1 C) 139.68 (s, 1 C) 145.47 (s, 1 C) 152.92 (s, 1 C) 156.85 (s, 1 C)

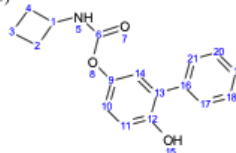

20120608\_mercury\_400\_ALLAN-C4-CARBON\_01.esp

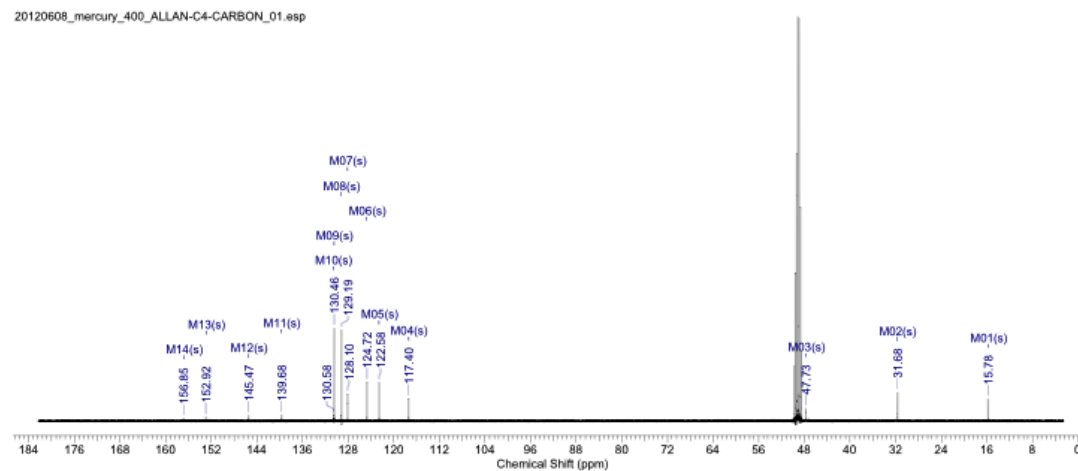

# <sup>1</sup>H and <sup>13</sup>C NMR of 5

XX

# <sup>1</sup>H NMR of 6

4/14/2011 8:08:19 AM

| Formula                | C                                                | H                      | N            | O                    | FW          | 288.3416       |       |  |
|------------------------|--------------------------------------------------|------------------------|--------------|----------------------|-------------|----------------|-------|--|
| Acquisition Time (sec) | 2.9925                                           | Date                   | Apr 13 2011  | Date Stamp           | Apr 13 2011 |                |       |  |
| File Name              | G:\INV-NMR-2\20110413-Allan-FAAH-12_1_Proton-002 |                        |              | Frequency (MHz)      | 399.40      | Nucleus        | 1H    |  |
| Number of Transients   | 16                                               | Original Points Count  | 19109        | Points Count         | 32758       | Pulse Sequence | s2pul |  |
| Receiver Gain          | 39.00                                            | Solvent                | CHLOROFORM-d | Spectrum Offset (Hz) | 2400.7354   |                |       |  |
| Sweep Width (Hz)       | 6385.70                                          | Temperature (degree C) | 25.000       |                      |             |                |       |  |

<sup>1</sup>H NMR (399 MHz, CHLOROFORM-d) δ ppm 1.14 - 1.30 (m, 3 H) 1.32 - 1.45 (m, 2 H) 1.50 - 1.68 (m, 3 H) 1.76 (dt, =9.16, 4.58 Hz, 2 H) 2.03 (d, =9.55 Hz, 2 H) 3.51 - 3.66 (m, 1 H) 4.06 (t, =9.45 Hz, 1 H) 4.43 (t, =9.65 Hz, 2 H) 7.22 - 7.31 (m, 2 H) 7.36 - 7.45 (m, 1 H) 7.53 - 7.63 (m, 1 H) 7.71 (s, 1 H) 7.79 (d, =7.99 Hz, 1 H)

20110413-Allan-FAAH-12\_1\_Proton-002.esp

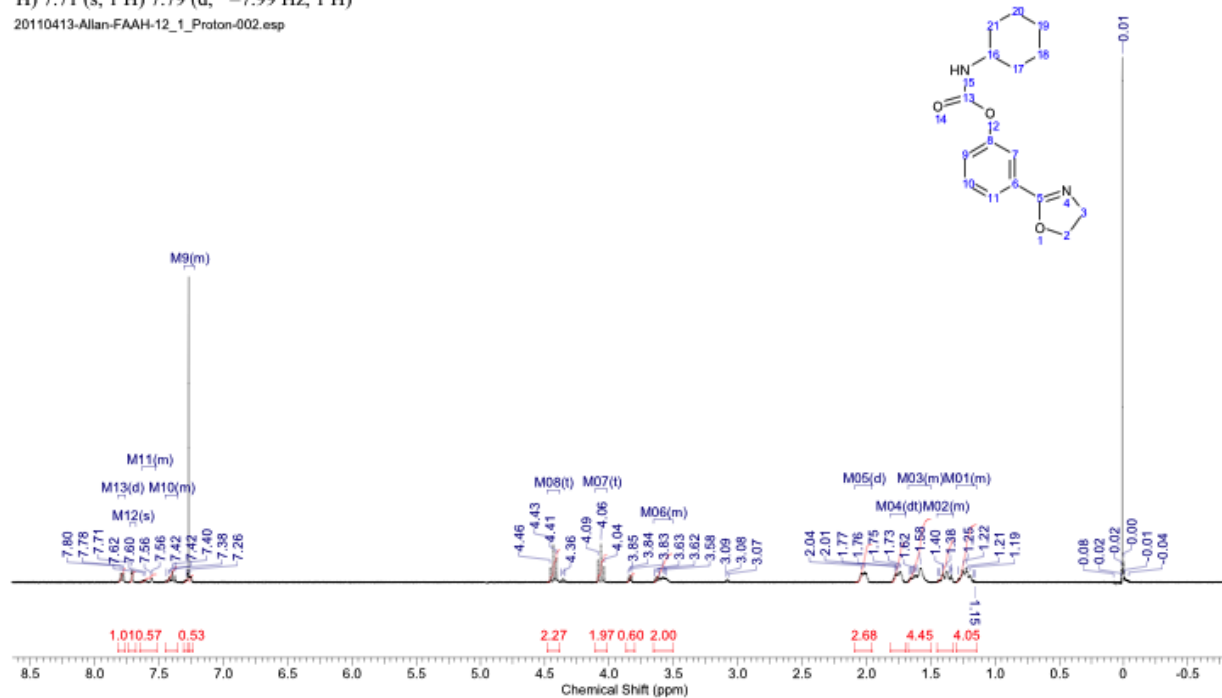

# <sup>1</sup>H NMR of 7

|                        |                                                  |                        |                                                  |
|------------------------|--------------------------------------------------|------------------------|--------------------------------------------------|
| Formula                | C <sub>15</sub> H <sub>12</sub> N <sub>2</sub> O | FW                     | 274.3150                                         |
| Acquisition Time (sec) | 2.9925                                           | Date                   | Apr 13 2011                                      |
| Date Stamp             | Apr 13 2011                                      | File Name              | G:\INV-NMR-Z\20110413-Allan-FAAH-15_2_Proton-002 |
| Frequency (MHz)        | 399.40                                           | Original Points Count  | 19109                                            |
| Points Count           | 32768                                            | Receiver Gain          | 30.00                                            |
| Nucleus                | 1H                                               | Solvent                | CHLOROFORM-d                                     |
| Pulse Sequence         | s2pul                                            | Temperature (degree C) | 25.000                                           |
| Spectrum Offset (Hz)   | 2398.5334                                        |                        |                                                  |

<sup>1</sup>H NMR (399 MHz, CHLOROFORM-*d*) δ ppm 1.28 - 1.41 (m, 1 H) 1.42 - 1.55 (m, 2 H) 1.55 - 1.76 (m, 4 H) 1.90 - 2.07 (m, 2 H) 4.00 - 4.11 (m, 2 H) 4.42 (t, =9.45 Hz, 2 H) 7.22 - 7.29 (m, 1 H) 7.39 (t, =7.89 Hz, 1 H) 7.70 (s, 1 H) 7.78 (d, =7.80 Hz, 1 H)

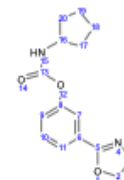

20110413-Allan-FAAH-15\_2\_Proton-002.esp

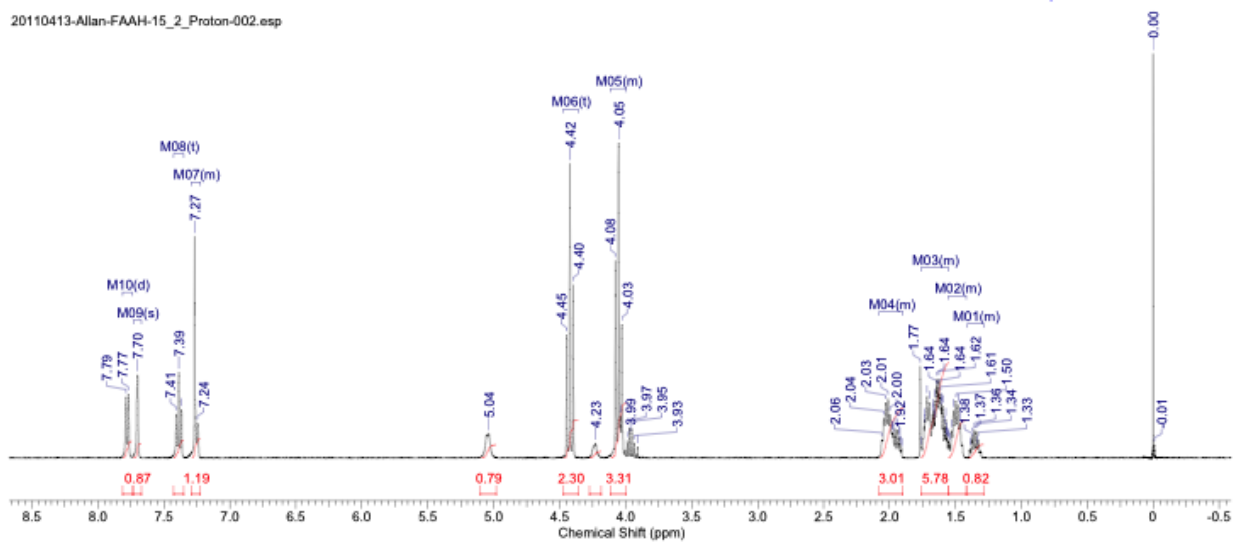

<sup>1</sup>H and <sup>13</sup>C NMR of **8**  
XX

# $^1\text{H}$ and $^{13}\text{C}$ NMR of **9**

11/2/2011 1:16:55 PM

|                        |                                                                                                        |                        |                                             |
|------------------------|--------------------------------------------------------------------------------------------------------|------------------------|---------------------------------------------|
| Formula                | C <sub>19</sub> H <sub>22</sub> N <sub>2</sub> O <sub>3</sub>                                          | FW                     | 326.3896                                    |
| Acquisition Time (sec) | 2.5559                                                                                                 | Comment                | chem_Proton_Day CDCl3 /opt/data/osadovsk_34 |
| Date Stamp             | 02 Nov 2011 15:21:36                                                                                   | Date                   | 02 Nov 2011 15:21:36                        |
| File Name              | F:\Flesh-BASH-RABOTAIN\NMR-2\20111102-osadovsk-Allan21-1.bkr\20111102-osadovsk-Allan21-1.bkr_000000fid |                        |                                             |
| Frequency (MHz)        | 400.22                                                                                                 | Nucleus                | $^1\text{H}$                                |
| Original Points Count  | 16384                                                                                                  | Owner                  | walkup                                      |
| Receiver Gain          | 161.00                                                                                                 | SWH (Hz)               | 6410.26                                     |
| Sweep Width (Hz)       | 6409.87                                                                                                | Temperature (degree C) | 25.160                                      |
|                        |                                                                                                        | Solvent                | CHLOROFORM-d                                |
|                        |                                                                                                        | Pulse Sequence         | zg45                                        |
|                        |                                                                                                        | Spectrum Offset (Hz)   | 2392.5789                                   |

$^1\text{H}$  NMR (400 MHz, CHLOROFORM-d)  $\delta$  ppm 1.49 - 1.64 (m, 2 H) 1.97 - 2.04 (m, 2 H) 2.08 - 2.16 (m, 2 H) 2.28 (s, 3 H) 2.79 (d, =11.74 Hz, 2 H) 3.50 - 3.66 (m, 1 H) 4.92 (d, =7.82 Hz, 1 H) 6.89 - 6.95 (m, 1 H) 6.97 - 7.04 (m, 2 H) 7.36 - 7.51 (m, 5 H)

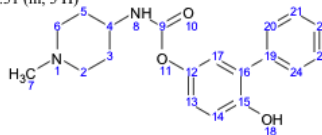

20111102-osadovsk-Allan21-1.bkr\_000000fid

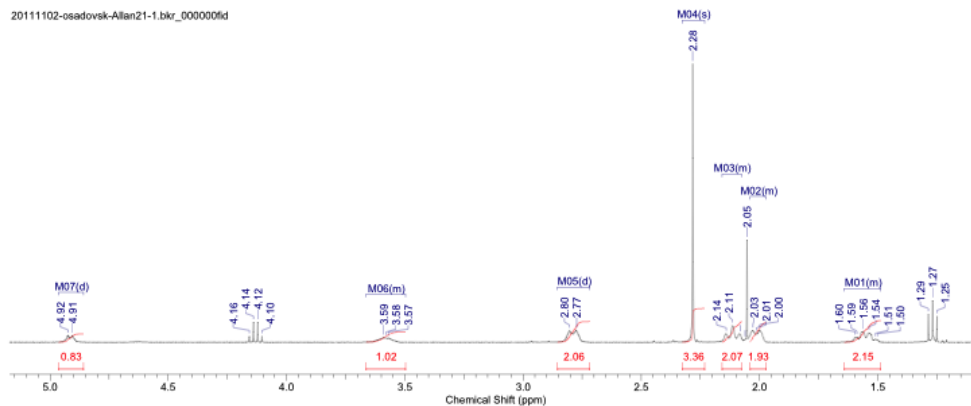

11/7/2011 12:03:56 PM

|                        |                                                                                |                        |            |                       |             |
|------------------------|--------------------------------------------------------------------------------|------------------------|------------|-----------------------|-------------|
| Acquisition Time (sec) | 1.3005                                                                         | Date                   | Nov 7 2011 | Date Stamp            | Nov 7 2011  |
| File Name              | C:\Documents and Settings\Oleg\Desktop\20111107-Allan FAAH_29_DMeOH_Carbon-002 |                        |            | Frequency (MHz)       | 100.43      |
| Nucleus                | $^{13}\text{C}$                                                                | Number of Transients   | 512        | Original Points Count | 31337       |
| Pulse Sequence         | s2pul                                                                          | Receiver Gain          | 39.00      | Solvent               | METHANOL-d4 |
| Sweep Width (Hz)       | 24096.38                                                                       | Temperature (degree C) | 25.000     | Spectrum Offset (Hz)  | 10544.0352  |

20111107-Allan FAAH\_29\_DMeOH\_Carbon-002

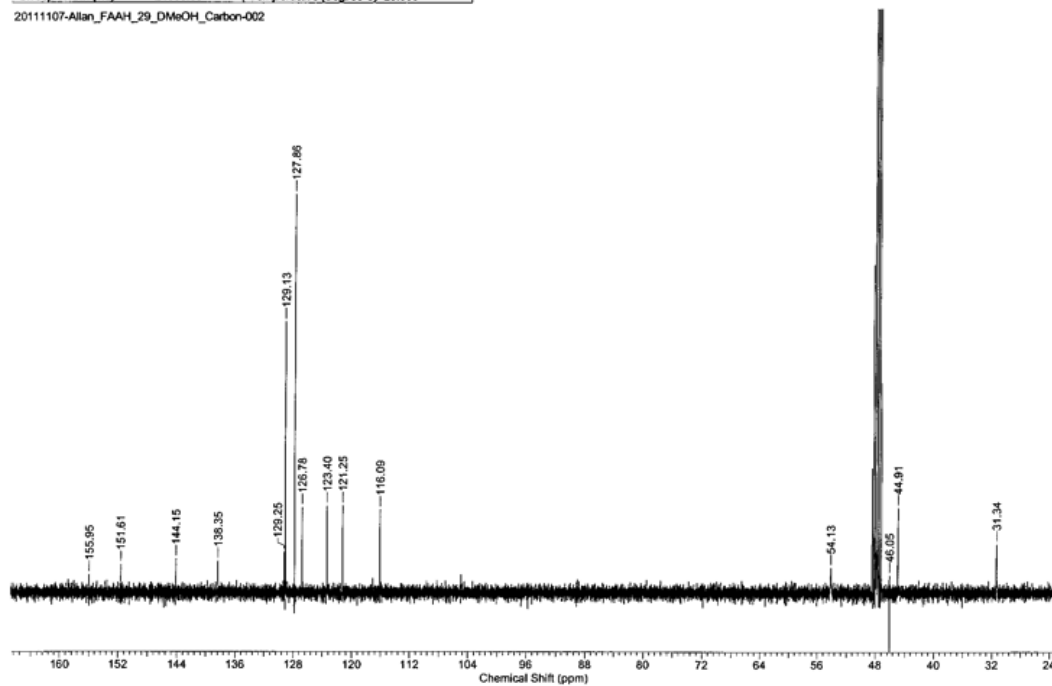

$^1\text{H}$  and  $^{13}\text{C}$  NMR of **10**

SpinWorks 3: FPC1

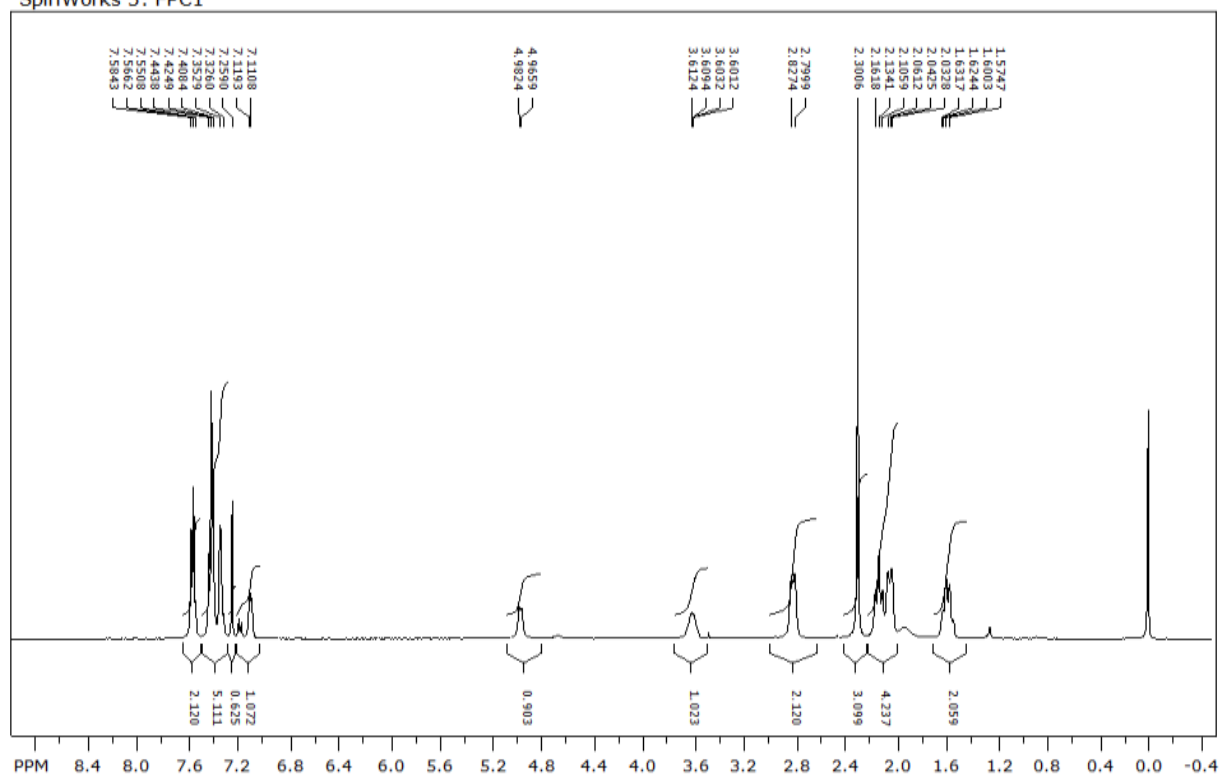

SpinWorks 3: JH348\_FPC1\_viacarbonate

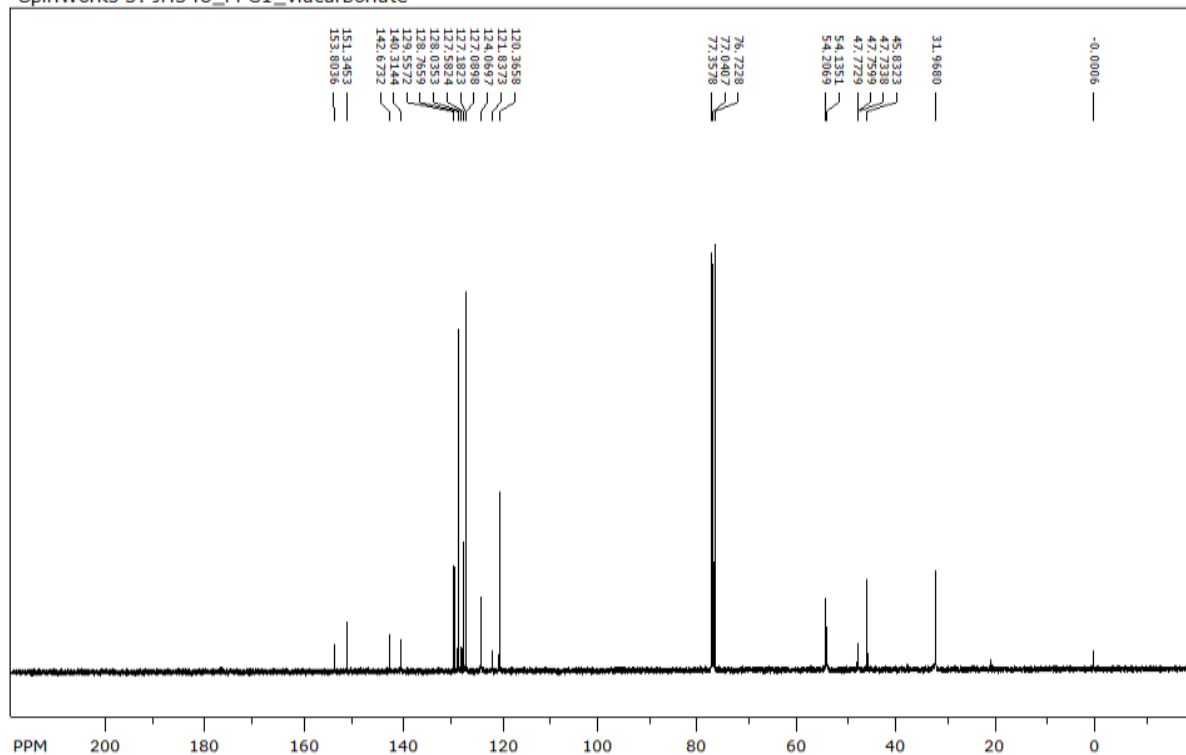

$^1\text{H}$  and  $^{13}\text{C}$  NMR of **11**

SpinWorks 3: JH356-FPC5 via carbonate

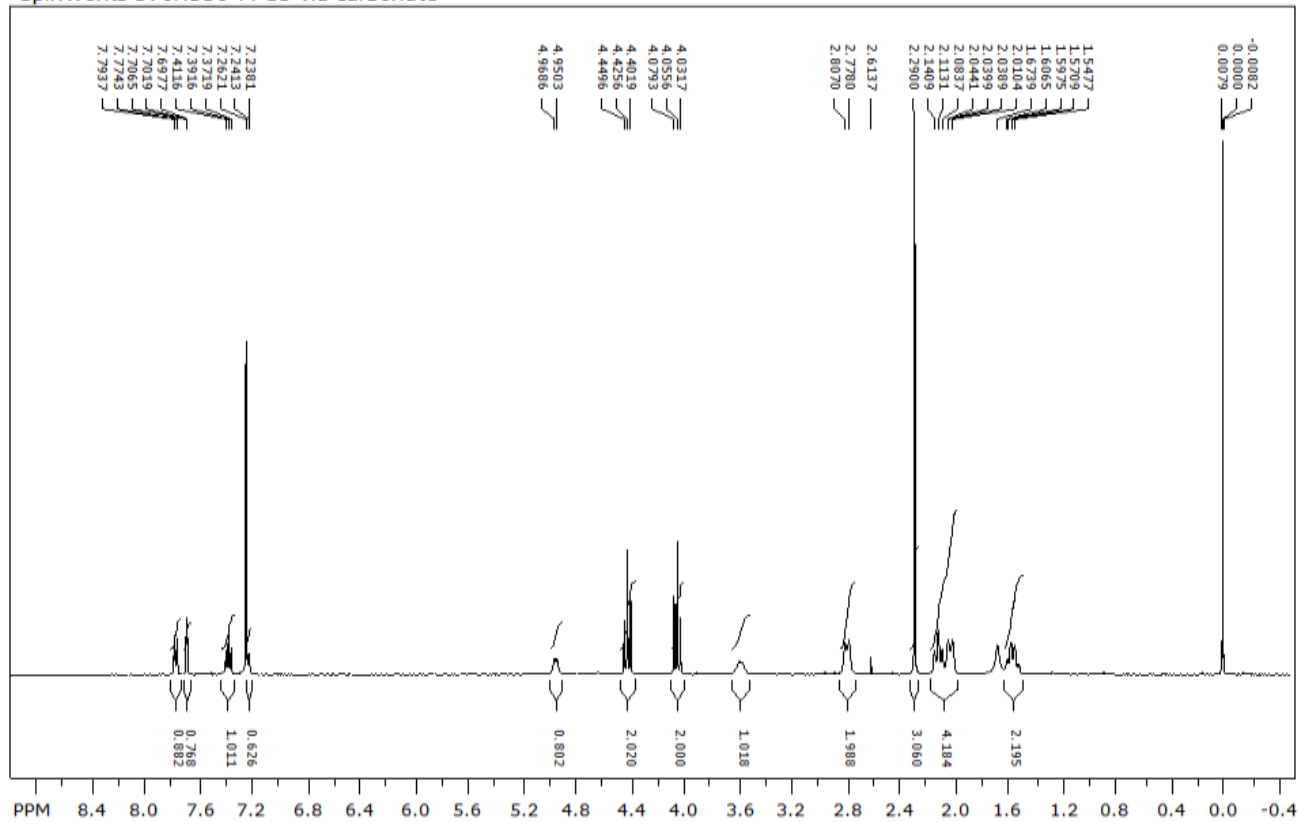

SpinWorks 3: JH356 - FPC5 via carbonate

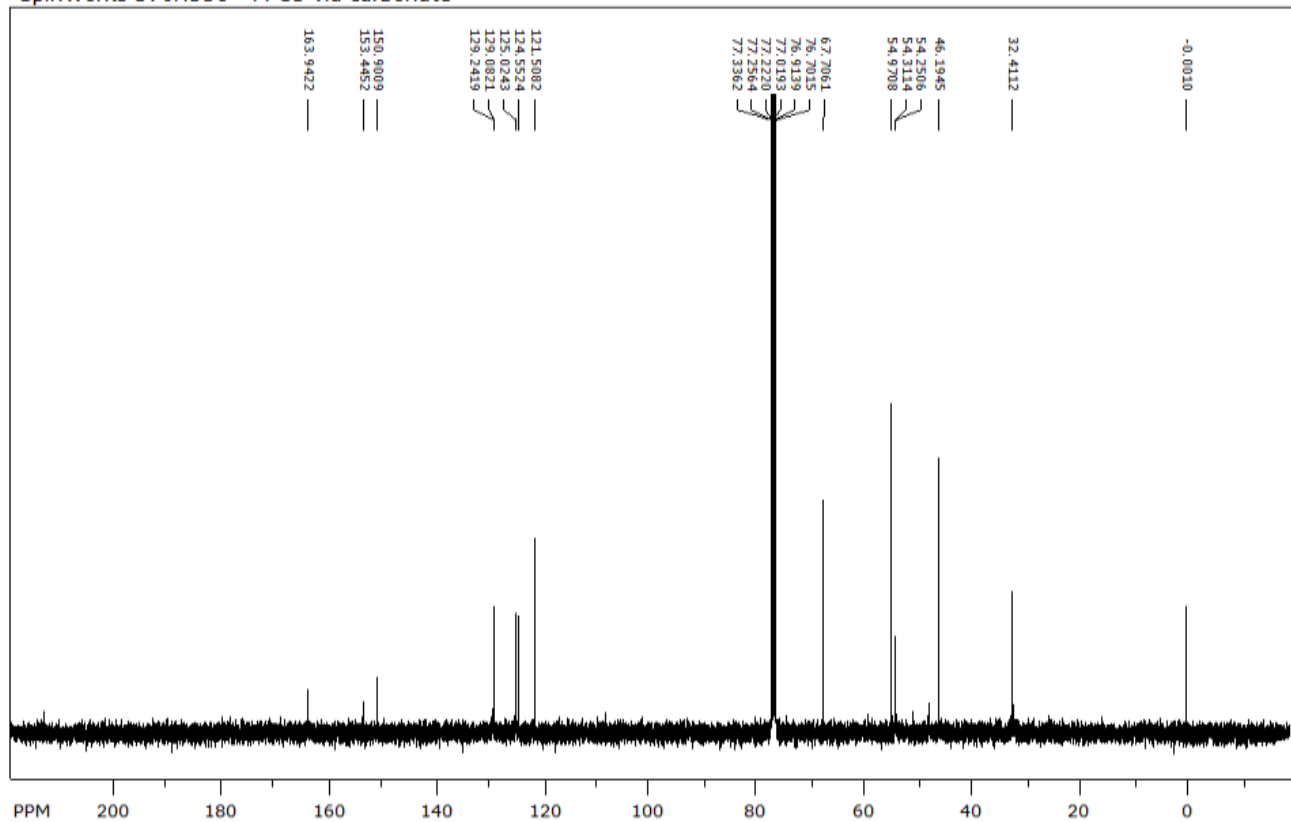



# $^1\text{H}$ and $^{13}\text{C}$ NMR of **14**

9/24/2012 11:17:25 AM

| Formula                | C                                                                            | H                      | O            | FW                    | 276.3291     |
|------------------------|------------------------------------------------------------------------------|------------------------|--------------|-----------------------|--------------|
| Acquisition Time (sec) | 2.9924                                                                       | Date                   | Jan. 3. 2012 | Date Stamp            | Jan. 3. 2012 |
| File Name              | F:\Flesh-BASH-RABOTA\NV\NV-NMR-2\20120103-NV_OBn_Right_DMSO_Proton_Minsw-001 |                        |              | Frequency (MHz)       | 399.36       |
| Nucleus                | $^1\text{H}$                                                                 | Number of Transients   | 16           | Original Points Count | 11292        |
| Pulse Sequence         | s2pul                                                                        | Receiver Gain          | 22.00        | Solvent               | DMSO-d6      |
| Spectrum Offset (Hz)   | 3773.98                                                                      | Temperature (degree C) | 25.000       | Points Count          | 2316.0420    |

$^1\text{H}$  NMR (399 MHz, DMSO- $d_6$ )  $\delta$  ppm 4.97 (s, 2 H) 6.70 - 6.76 (m, 2 H) 7.01 (d, =8.52 Hz, 1 H) 7.24 - 7.35 (m, 6 H) 7.36 - 7.43 (m, 2 H) 7.48 - 7.54 (m, 2 H) 9.11 (s, 1 H)

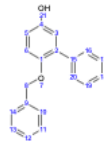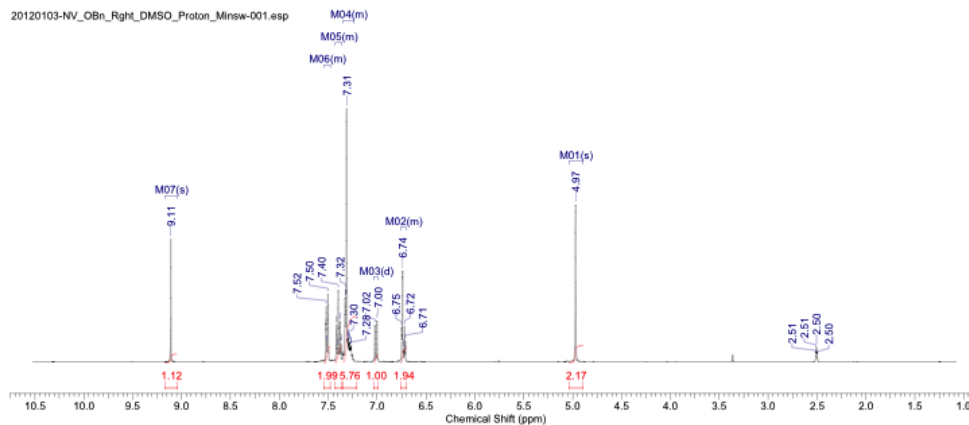

9/24/2012 11:22:56 AM

| Formula                | C                                                                           | H                    | O           | FW                     | 276.3291     |
|------------------------|-----------------------------------------------------------------------------|----------------------|-------------|------------------------|--------------|
| Acquisition Time (sec) | 2.9925                                                                      | Date                 | Nov 20 2011 | Date Stamp             | Nov 20 2011  |
| File Name              | F:\Flesh-BASH-RABOTA\NV\NV-NMR-2\20111120-NV_1BnO_Right_3h_Proton_Minsw-001 |                      |             | Frequency (MHz)        | 399.36       |
| Nucleus                | $^1\text{H}$                                                                | Number of Transients | 16          | Original Points Count  | 11644        |
| Pulse Sequence         | s2pul                                                                       | Receiver Gain        | 18.00       | Solvent                | CHLOROFORM-d |
| Spectrum Offset (Hz)   | 1522.0955                                                                   | Sweep Width (Hz)     | 3891.05     | Temperature (degree C) | 25.000       |

$^1\text{H}$  NMR (399 MHz, CHLOROFORM- $d$ )  $\delta$  ppm 4.87 (s, 1 H) 4.94 (s, 2 H) 6.73 (dd, =8.79, 3.09 Hz, 1 H) 6.84 (d, =3.09 Hz, 1 H) 6.91 (d, =8.79 Hz, 1 H) 7.21 - 7.46 (m, 8 H) 7.53 - 7.61 (m, 2 H)

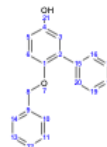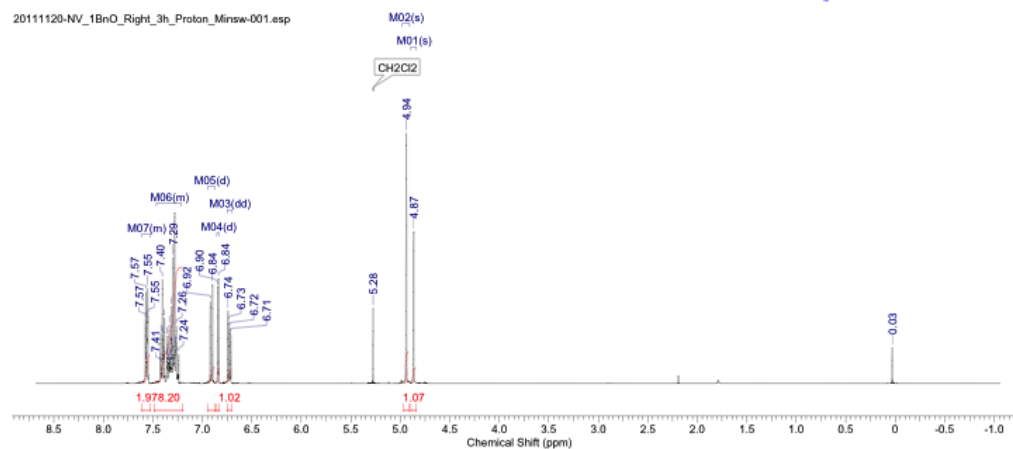

Formula C<sub>14</sub>H<sub>10</sub>O<sub>2</sub> FW 276.3291

|                        |                                                                      |                        |            |                       |                 |                      |            |
|------------------------|----------------------------------------------------------------------|------------------------|------------|-----------------------|-----------------|----------------------|------------|
| Acquisition Time (sec) | 1.3005                                                               | Date                   | Jan 3 2012 | Date Stamp            | Jan 3 2012      |                      |            |
| File Name              | F:\Flash-BASH-RABOTA\NV\NV-NMR-20120103-NV_OBn_Right_DMSO_Carbon-002 |                        |            |                       | Frequency (MHz) | 100.43               |            |
| Nucleus                | 13C                                                                  | Number of Transients   | 512        | Original Points Count | 31337           | Points Count         | 32768      |
| Pulse Sequence         | s2pul                                                                | Receiver Gain          | 39.00      | Solvent               | DMSO-d6         | Spectrum Offset (Hz) | 10544.0293 |
| Sweep Width (Hz)       | 24096.38                                                             | Temperature (degree C) | 25.000     |                       |                 |                      |            |

<sup>13</sup>C NMR (100 MHz, DMSO-*d*<sub>6</sub>) δ ppm 71.29, 115.39, 116.09, 117.78, 127.55, 127.88, 128.18, 128.61, 128.93, 129.86, 132.10, 138.18, 138.95, 148.70, 152.32

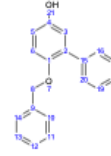

20120103-NV\_OBn\_Right\_DMSO\_Carbon-002.esp

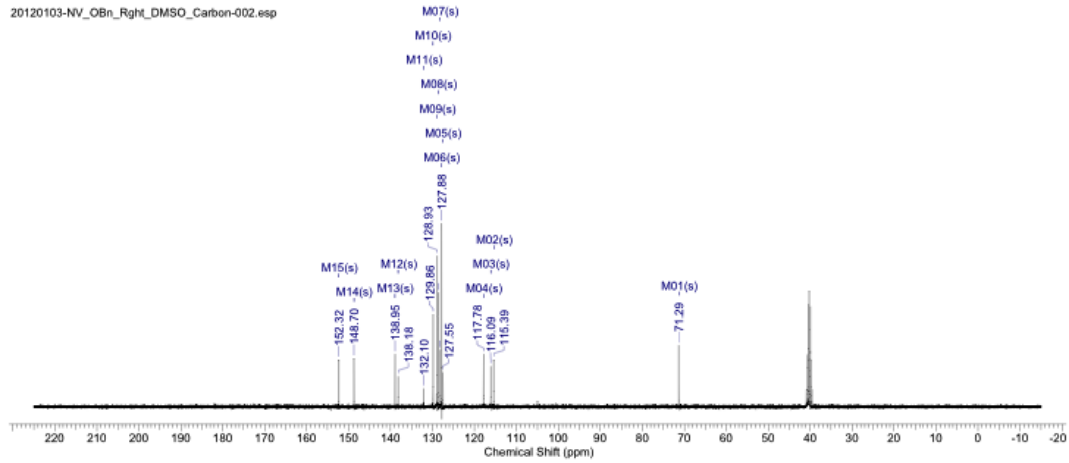

# <sup>1</sup>H and <sup>13</sup>C NMR of 15

9/21/2012 11:14:10 AM

| Formula                | C <sub>19</sub> H <sub>16</sub> O <sub>2</sub> | FW                   | 276.3291                                                        |
|------------------------|------------------------------------------------|----------------------|-----------------------------------------------------------------|
| Acquisition Time (sec) | 2.9925                                         | Date                 | Dec.13.2011                                                     |
| Date Stamp             | Dec.13.2011                                    | File Name            | F:\Flesh-BASH-RABOTA\NV\NV-NMR-2\20111213-NV_F2_DMSO_Proton-002 |
| Frequency (MHz)        | 399.36                                         | Points Count         | 32768                                                           |
| Nucleus                | <sup>1</sup> H                                 | Number of Transients | 16                                                              |
| Original Points Count  | 19109                                          | Pulse Sequence       | s2pul                                                           |
| Receiver Gain          | 12.00                                          | Solvent              | DMSO-d <sub>6</sub>                                             |
| Spectrum Offset (Hz)   | 2402.2405                                      | Sweep Width (Hz)     | 6385.70                                                         |
| Temperature (degree C) | 25.000                                         |                      |                                                                 |

<sup>1</sup>H NMR (399 MHz, DMSO-d<sub>6</sub>) δ ppm 5.07 (s, 2 H) 6.87 (dd J=8.77 Hz, J=2.92 Hz, 1 H) 6.92 (d, J=8.77 Hz, 1 H) 6.96 (d, J=2.92 Hz, 1 H) 7.27 - 7.35 (m, 2 H) 7.36 - 7.48 (m, 6 H) 7.55 - 7.62 (m, 2 H) 9.13 (s, 1 H)

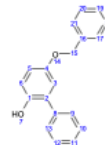

20111213-NV\_F2\_DMSO\_Proton-002.esp

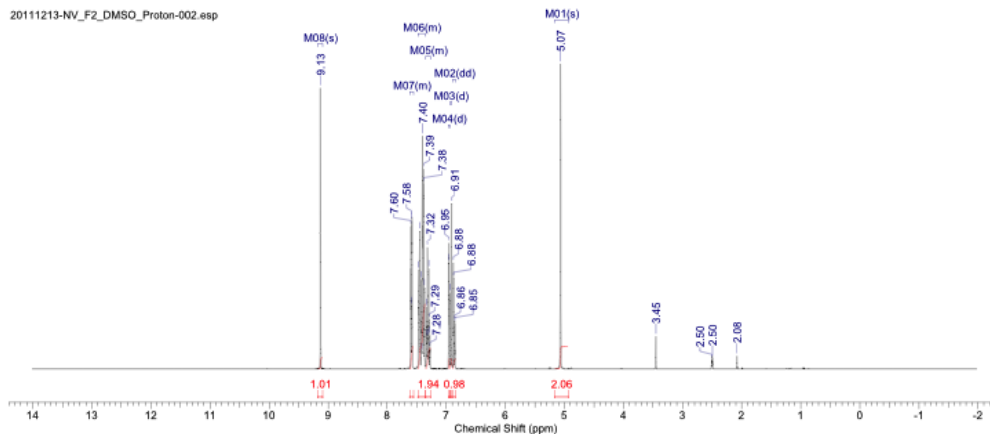

9/21/2012 11:17:13 AM

| Formula                | C <sub>19</sub> H <sub>16</sub> O <sub>2</sub> | FW                   | 276.3291                                                                    |
|------------------------|------------------------------------------------|----------------------|-----------------------------------------------------------------------------|
| Acquisition Time (sec) | 1.3005                                         | Date                 | Dec.13.2011                                                                 |
| Date Stamp             | Dec.13.2011                                    | File Name            | F:\Flesh-BASH-RABOTA\NV\NV-NMR-2\20111213-NV_274_F2_mono_Bn_NRht_Carbon-002 |
| Frequency (MHz)        | 100.43                                         | Points Count         | 32768                                                                       |
| Nucleus                | <sup>13</sup> C                                | Number of Transients | 512                                                                         |
| Original Points Count  | 31337                                          | Pulse Sequence       | s2pul                                                                       |
| Receiver Gain          | 39.00                                          | Solvent              | CHLOROFORM-d                                                                |
| Spectrum Offset (Hz)   | 10543.9844                                     | Sweep Width (Hz)     | 24096.38                                                                    |
| Temperature (degree C) | 25.000                                         |                      |                                                                             |

<sup>13</sup>C NMR (100 MHz, CHLOROFORM-d) δ ppm 71.08, 115.95, 116.84, 116.88, 127.81, 128.18, 128.83, 128.98, 129.29, 129.49, 137.47, 146.91, 153.11

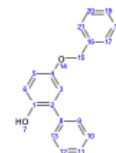

20111213-NV\_274\_F2\_mono\_Bn\_NRht\_Carbon-002.esp

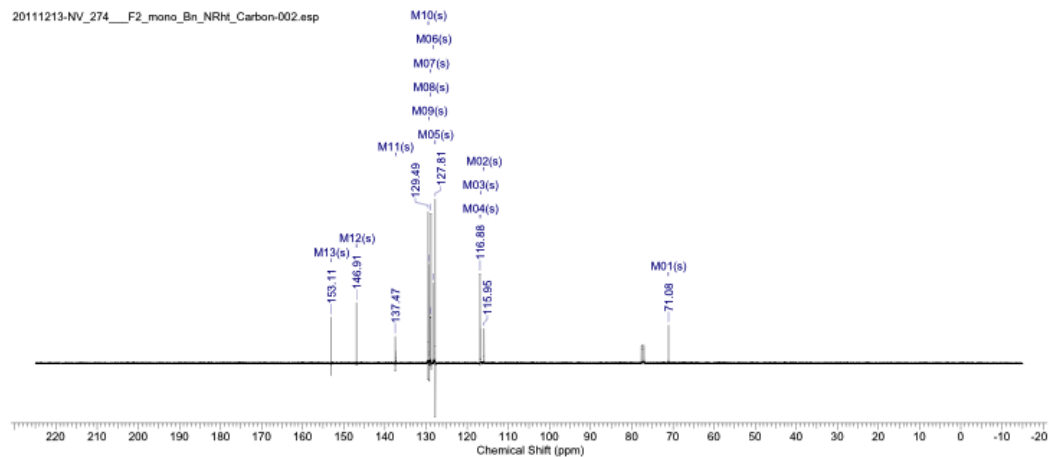

# <sup>1</sup>H and <sup>13</sup>C NMR of 16

9/25/2012 1:16:23 PM

| Formula C <sub>24</sub> H <sub>22</sub> O <sub>2</sub> |                                                         | FW 366.4517          |             |                        |              |
|--------------------------------------------------------|---------------------------------------------------------|----------------------|-------------|------------------------|--------------|
| Acquisition Time (sec)                                 | 2.5641                                                  | Date                 | Sep 25 2012 | Date Stamp             | Sep 25 2012  |
| File Name                                              | F:\INV-NMR-2\20120925_mercury_400_A2772Bn-C13-PROTON_01 | Frequency (MHz)      | 399.31      |                        |              |
| Nucleus                                                | <sup>1</sup> H                                          | Number of Transients | 16          | Original Points Count  | 16384        |
| Pulse Sequence                                         | s2pul                                                   | Receiver Gain        | 30.00       | Solvent                | CHLOROFORM-d |
| Spectrum Offset (Hz)                                   | 2383.6860                                               | Sweep Width (Hz)     | 6389.78     | Temperature (degree C) | 25.000       |

<sup>1</sup>H NMR (399 MHz, CHLOROFORM-d) δ ppm 4.95 (s, 2 H) 5.04 (s, 2 H) 6.87 (dd, =8.97 Hz, =3.12 Hz, 1 H) 6.95 (d, =8.97 Hz, 1 H) 7.02 (d, =3.12 Hz, 1 H) 7.22 - 7.47 (m, 13 H) 7.54 - 7.60 (m, 2 H)

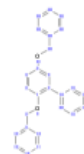

20120925\_mercury\_400\_A2772Bn-C13-PROTON\_01

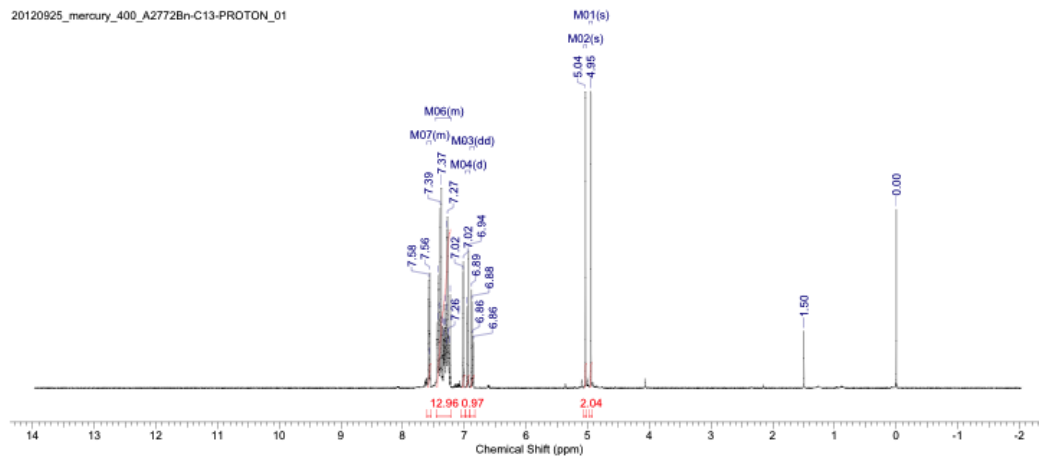

9/25/2012 1:37:11 PM

| Formula C <sub>24</sub> H <sub>22</sub> O <sub>2</sub> |                                                         | FW 366.4517          |             |                        |              |
|--------------------------------------------------------|---------------------------------------------------------|----------------------|-------------|------------------------|--------------|
| Acquisition Time (sec)                                 | 1.3042                                                  | Date                 | Sep 25 2012 | Date Stamp             | Sep 25 2012  |
| File Name                                              | F:\INV-NMR-2\20120925_mercury_400_A2772Bn-C13-CARBON_01 | Frequency (MHz)      | 100.42      |                        |              |
| Nucleus                                                | <sup>13</sup> C                                         | Number of Transients | 256         | Original Points Count  | 32768        |
| Pulse Sequence                                         | s2pul                                                   | Receiver Gain        | 39.00       | Solvent                | CHLOROFORM-d |
| Spectrum Offset (Hz)                                   | 11044.5479                                              | Sweep Width (Hz)     | 25125.63    | Temperature (degree C) | 25.000       |

<sup>13</sup>C NMR (100 MHz, CHLOROFORM-d) δ ppm 70.67, 71.65, 114.29, 115.52, 117.73, 127.02, 127.08, 127.52, 127.55, 127.93, 127.97, 128.36, 128.57, 129.56, 132.72, 137.20, 137.42, 138.33, 150.04, 153.44

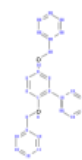

20120925\_mercury\_400\_A2772Bn-C13-CARBON\_01.esp

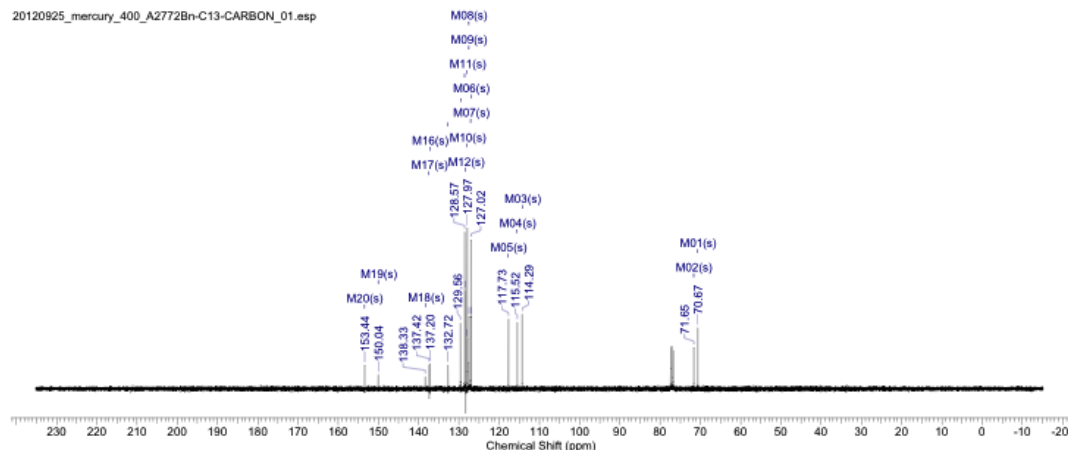

Supplement: jm301492y_si_001.pdf [file jm301492y_si_001.pdf]
